# Supplementary material
Source: PubMed Central journal article supplement (PMC1805515)

A Scores 1 and 2: *Mytilus californianus*

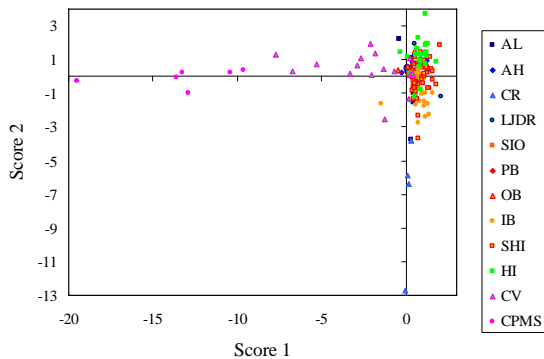

B Scores 3 and 4: *Mytilus californianus*

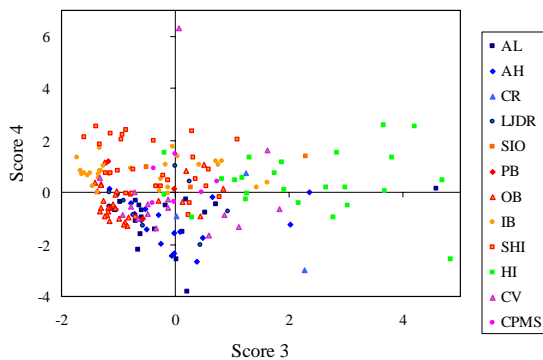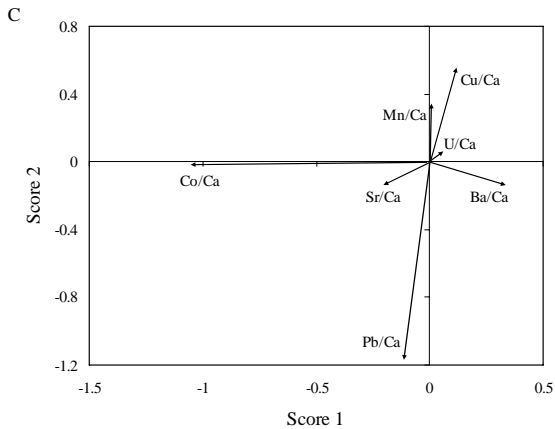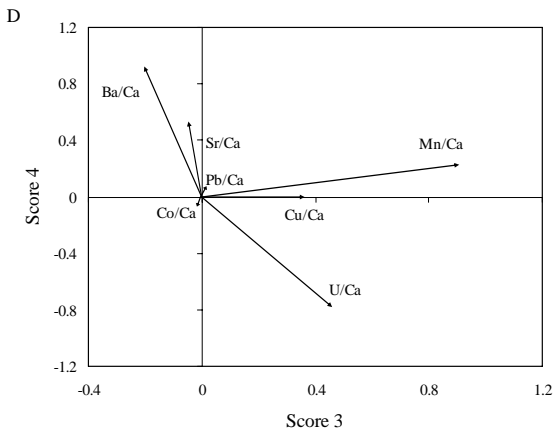

Supplement: pnas_0611651104_1.pdf [file pnas_0611651104_1.pdf]

**A** Scores 1 and 2: Both Species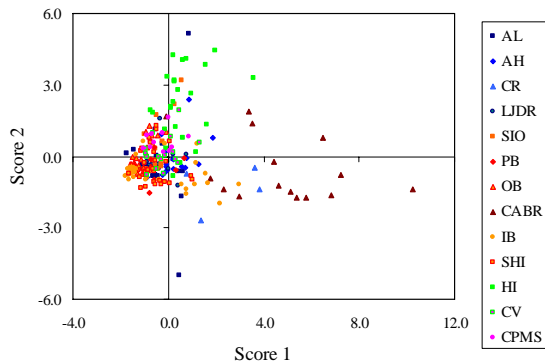**B** Scores 3 and 4: Both Species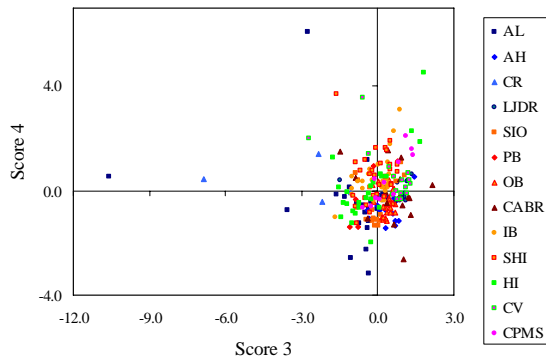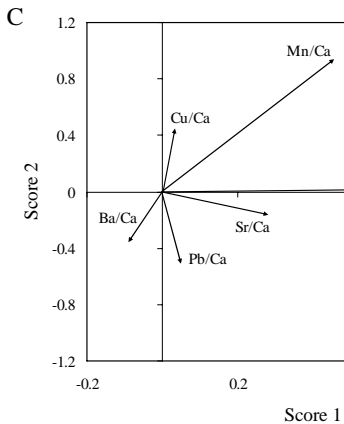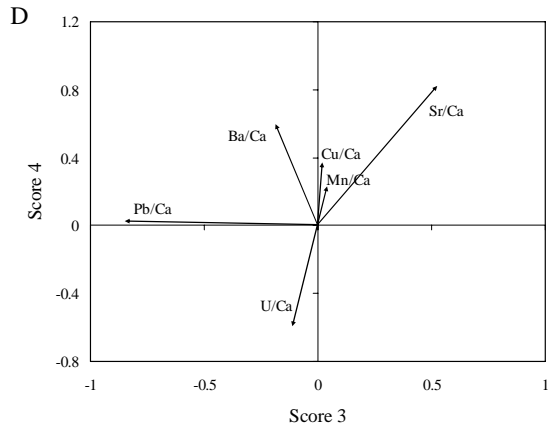

Supplement: pnas_0611651104_2.pdf [file pnas_0611651104_2.pdf]
